# Supplementary material for: Evaluation of anti-inflammatory activity and molecular docking study of new aza-bicyclic isoxazoline acylhydrazone derivatives
Source: Royal Society of Chemistry journal article supplement (doi:10.1039/c9md00276f), 2019-01-01

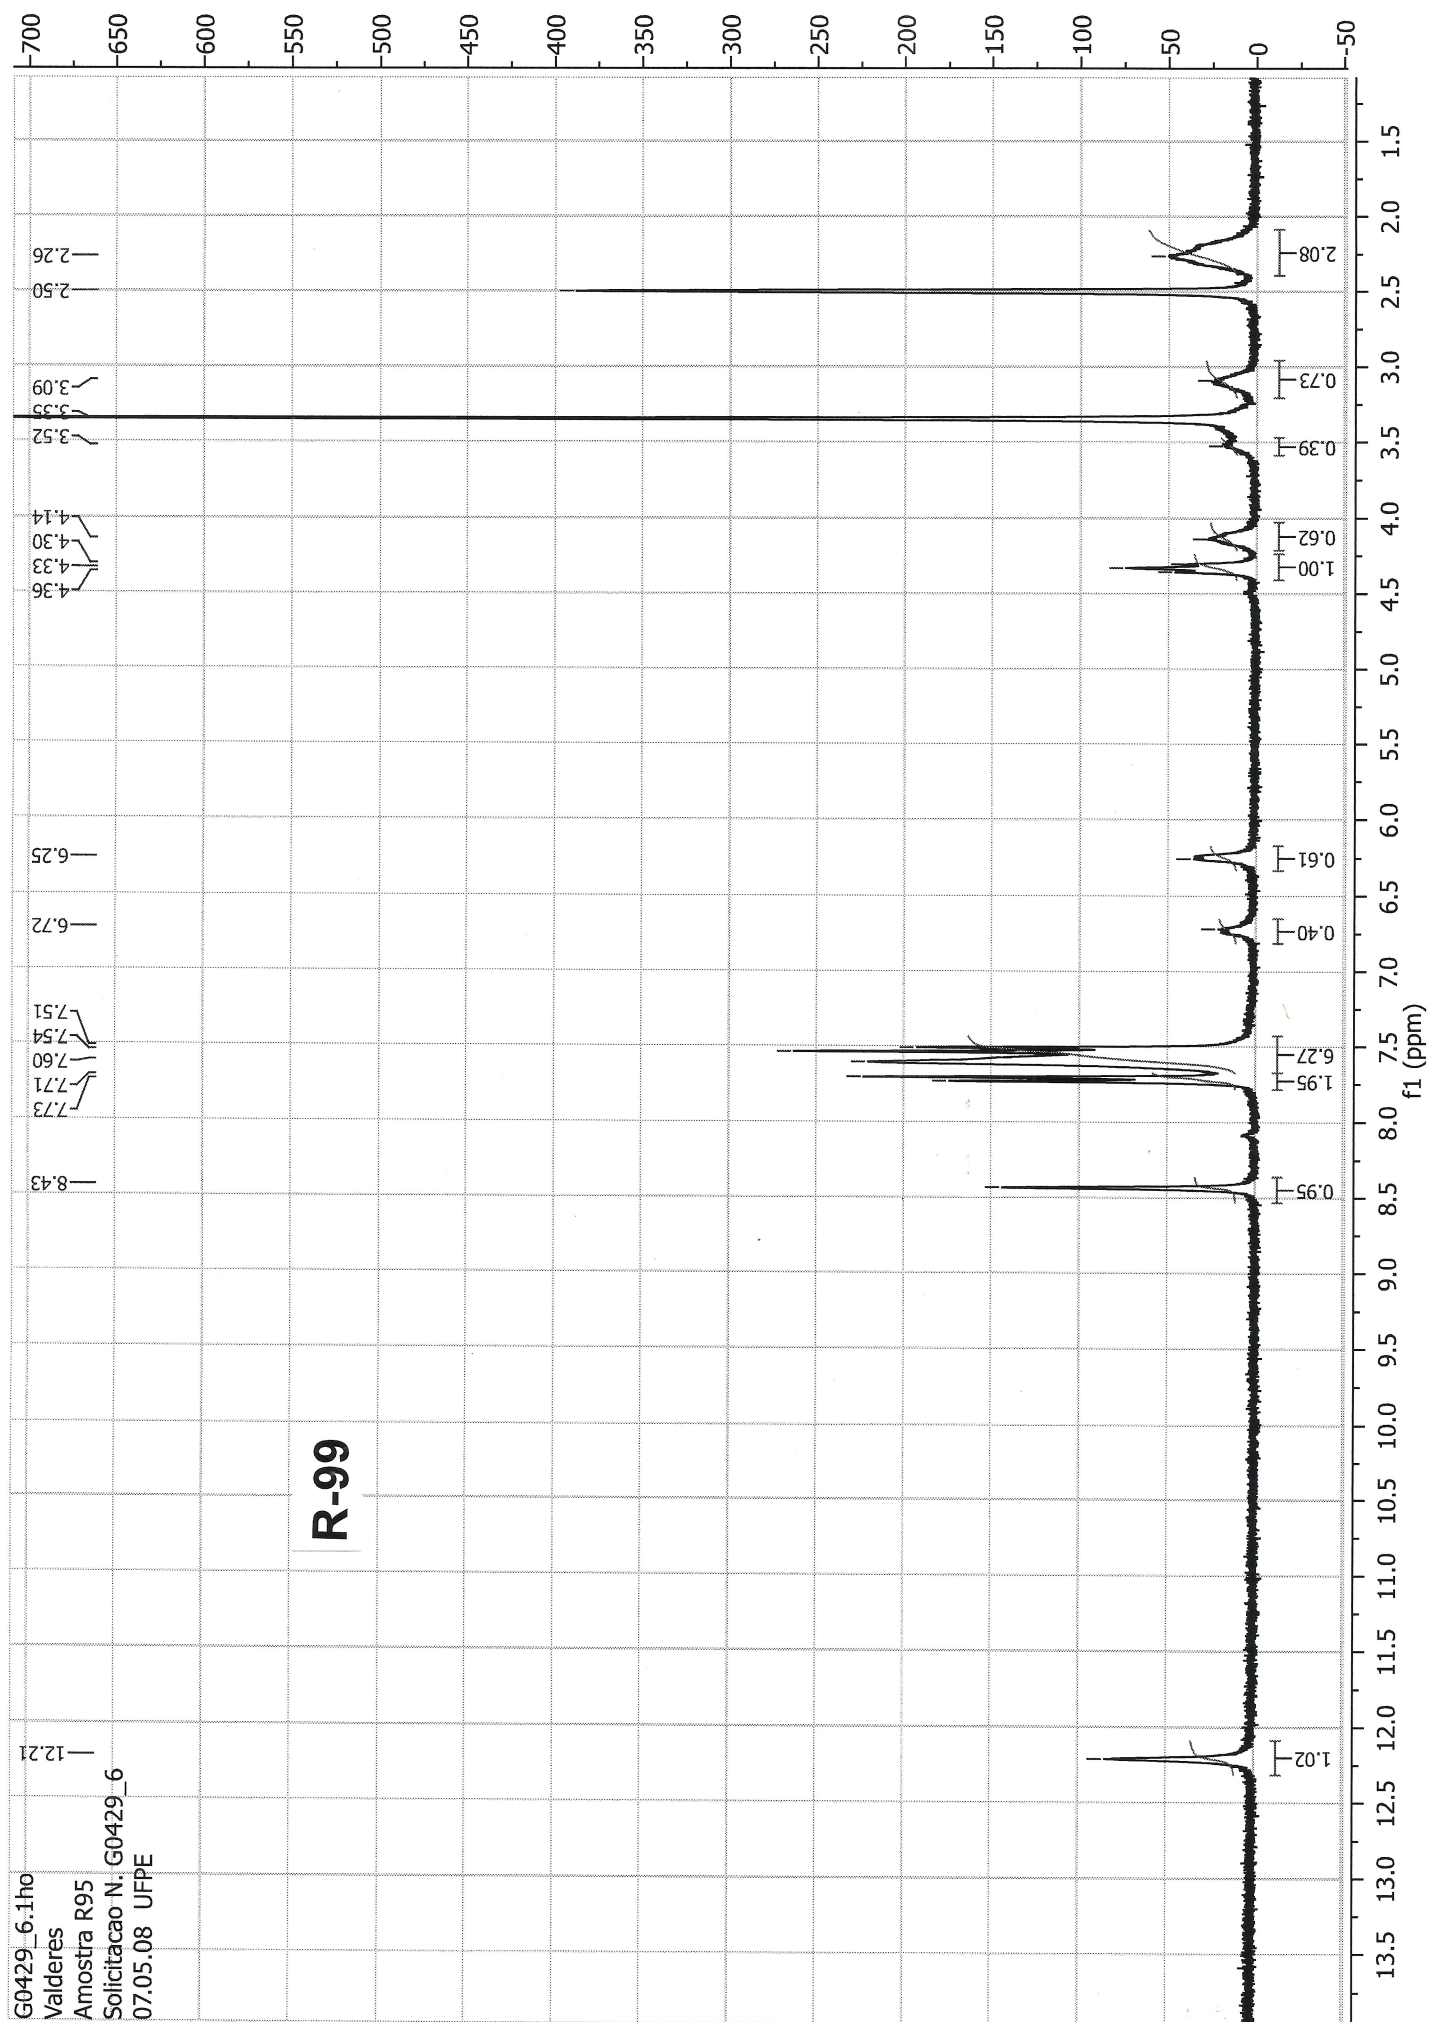

Valderes  
Amostra:  
Solicitação N. G0429\_6  
07.05.08 UFPE

Pulse Sequence: s2pul

Solvent: DMSO  
Temp. 65.0 C / 338.1 K  
File: G0429\_6.1hof  
UNITYplus-300 "UFPEU300"

Pulse 45.0 degrees  
Acq. time 3.641 sec  
Width 4499.4 Hz  
16 repetitions

OBSERVE H1, 299.9547893 MHZ  
DATA PROCESSING  
Line broadening 0.5 Hz  
FT size 32768  
Total time 0 min, 58 sec

**R-99 65°C**

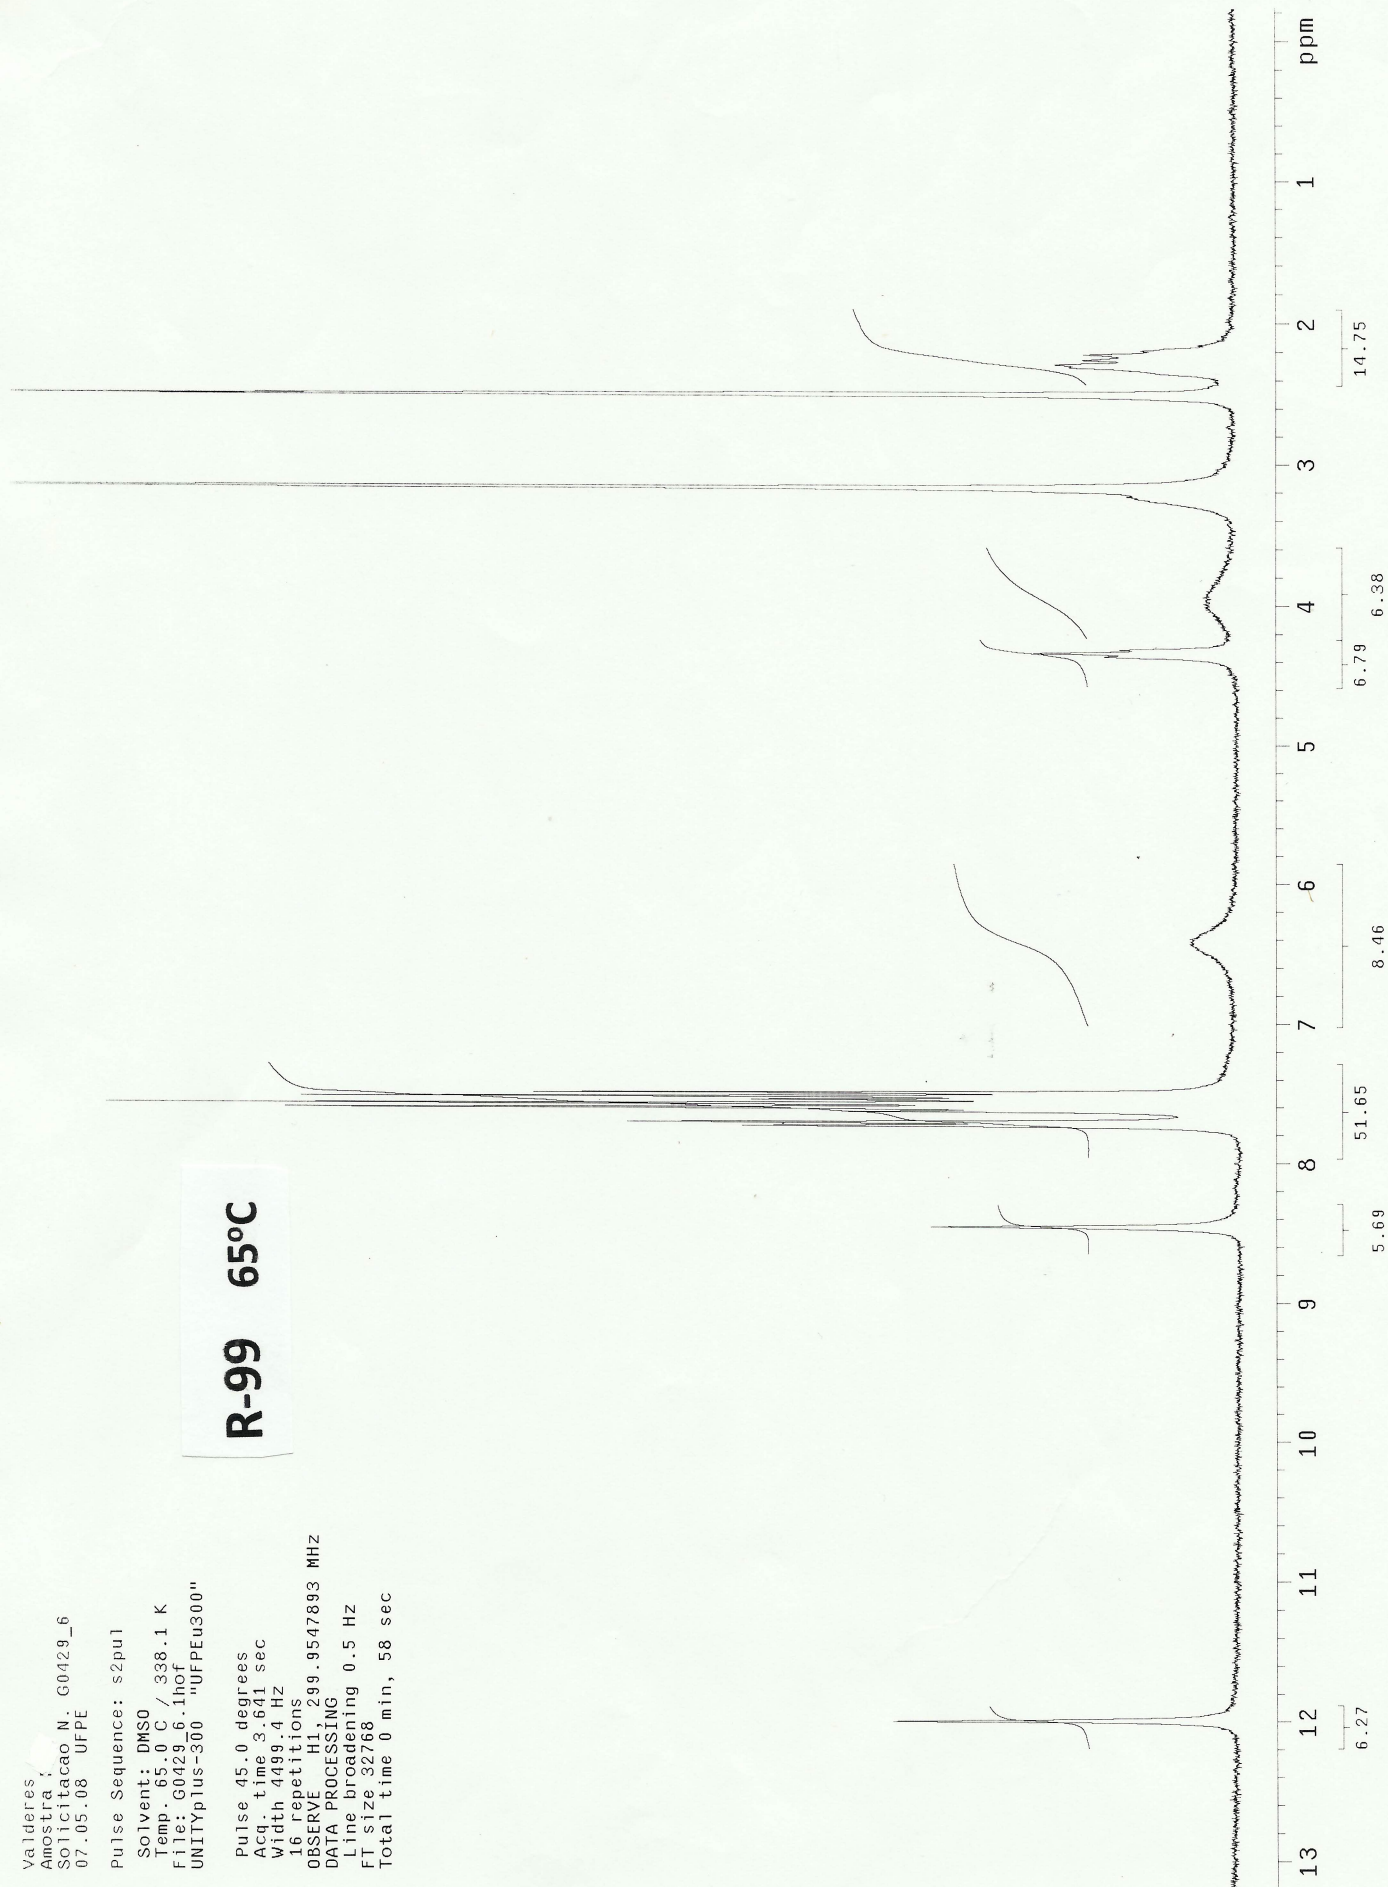



$^{13}\text{C}$  RMN

R-99

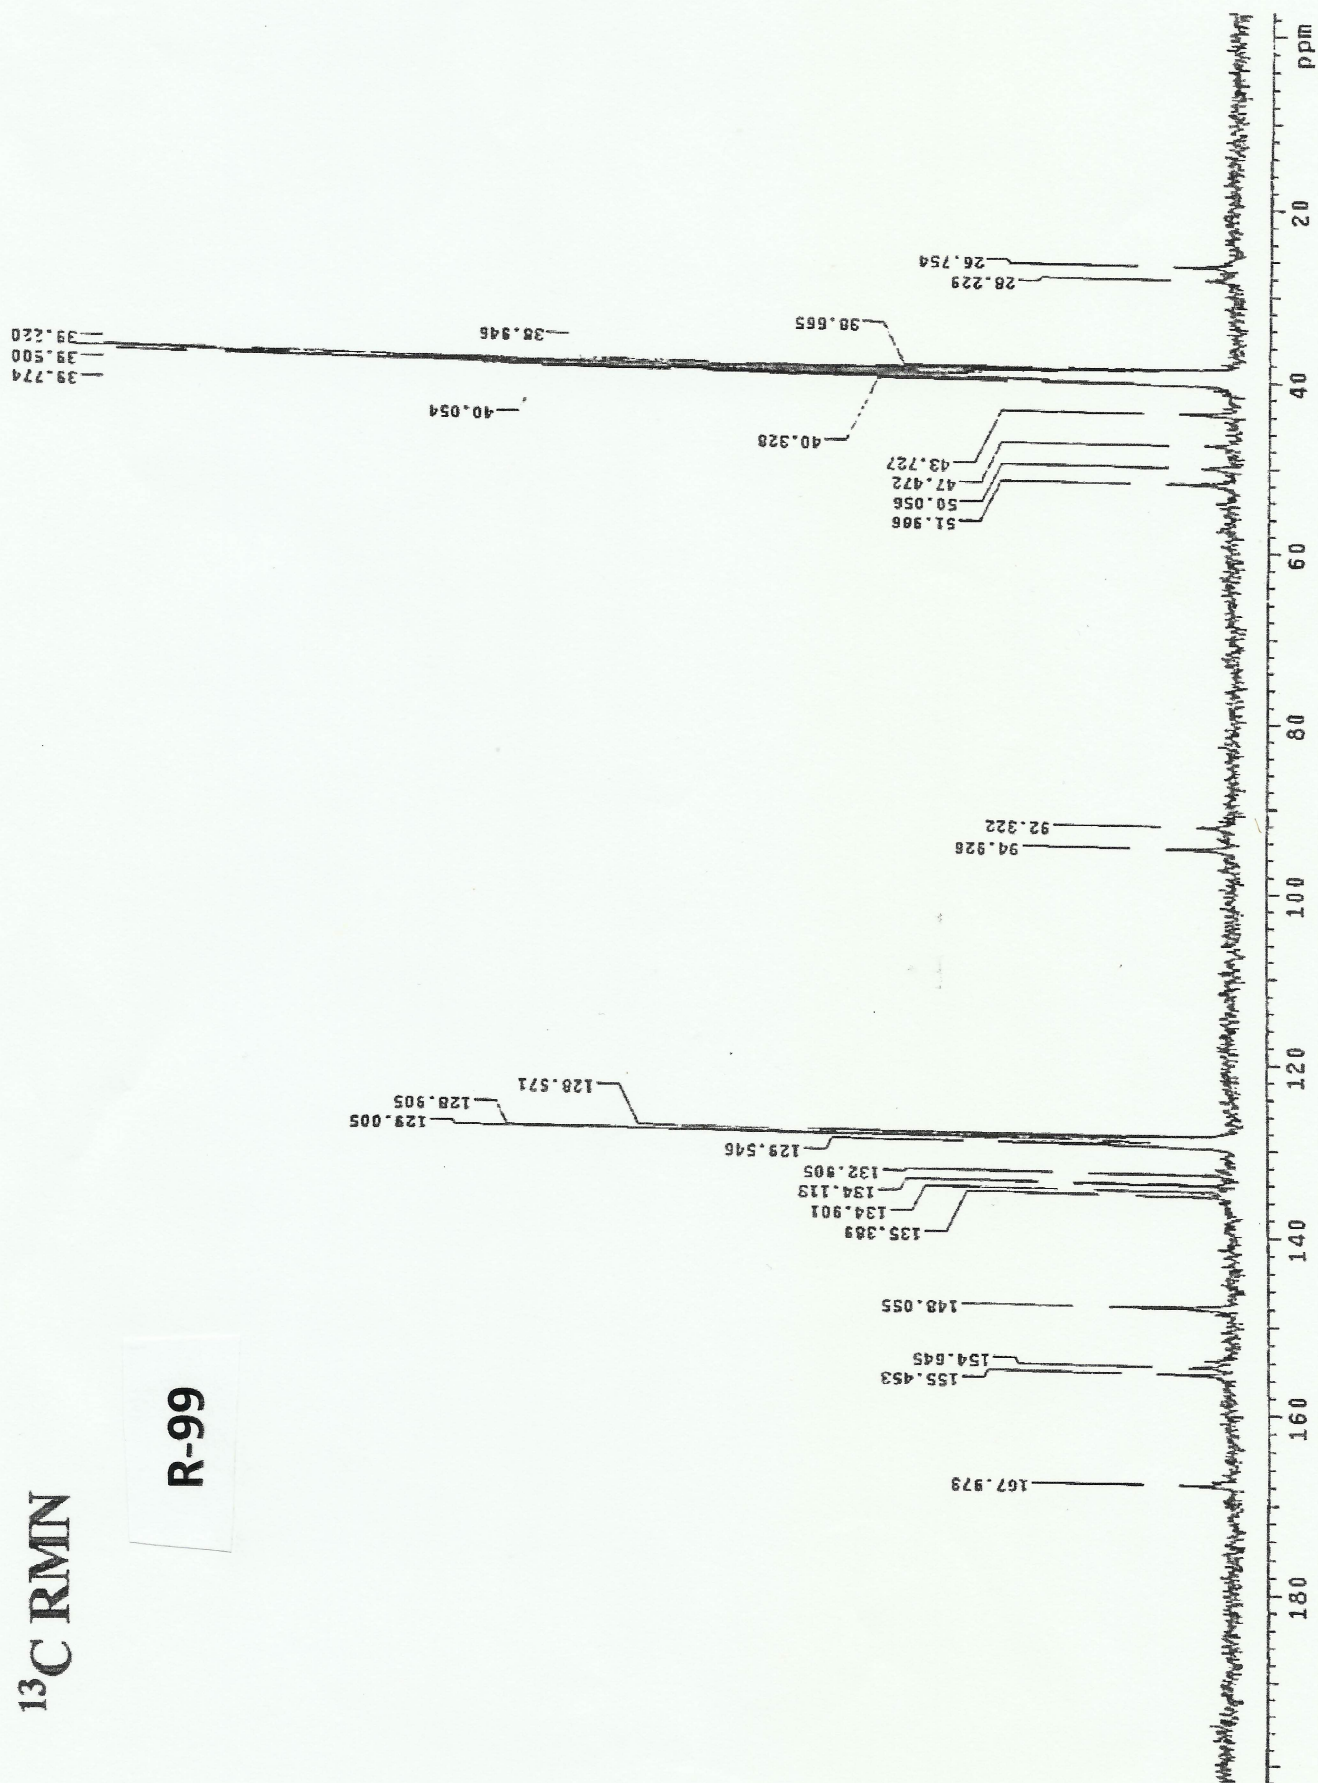

R-99

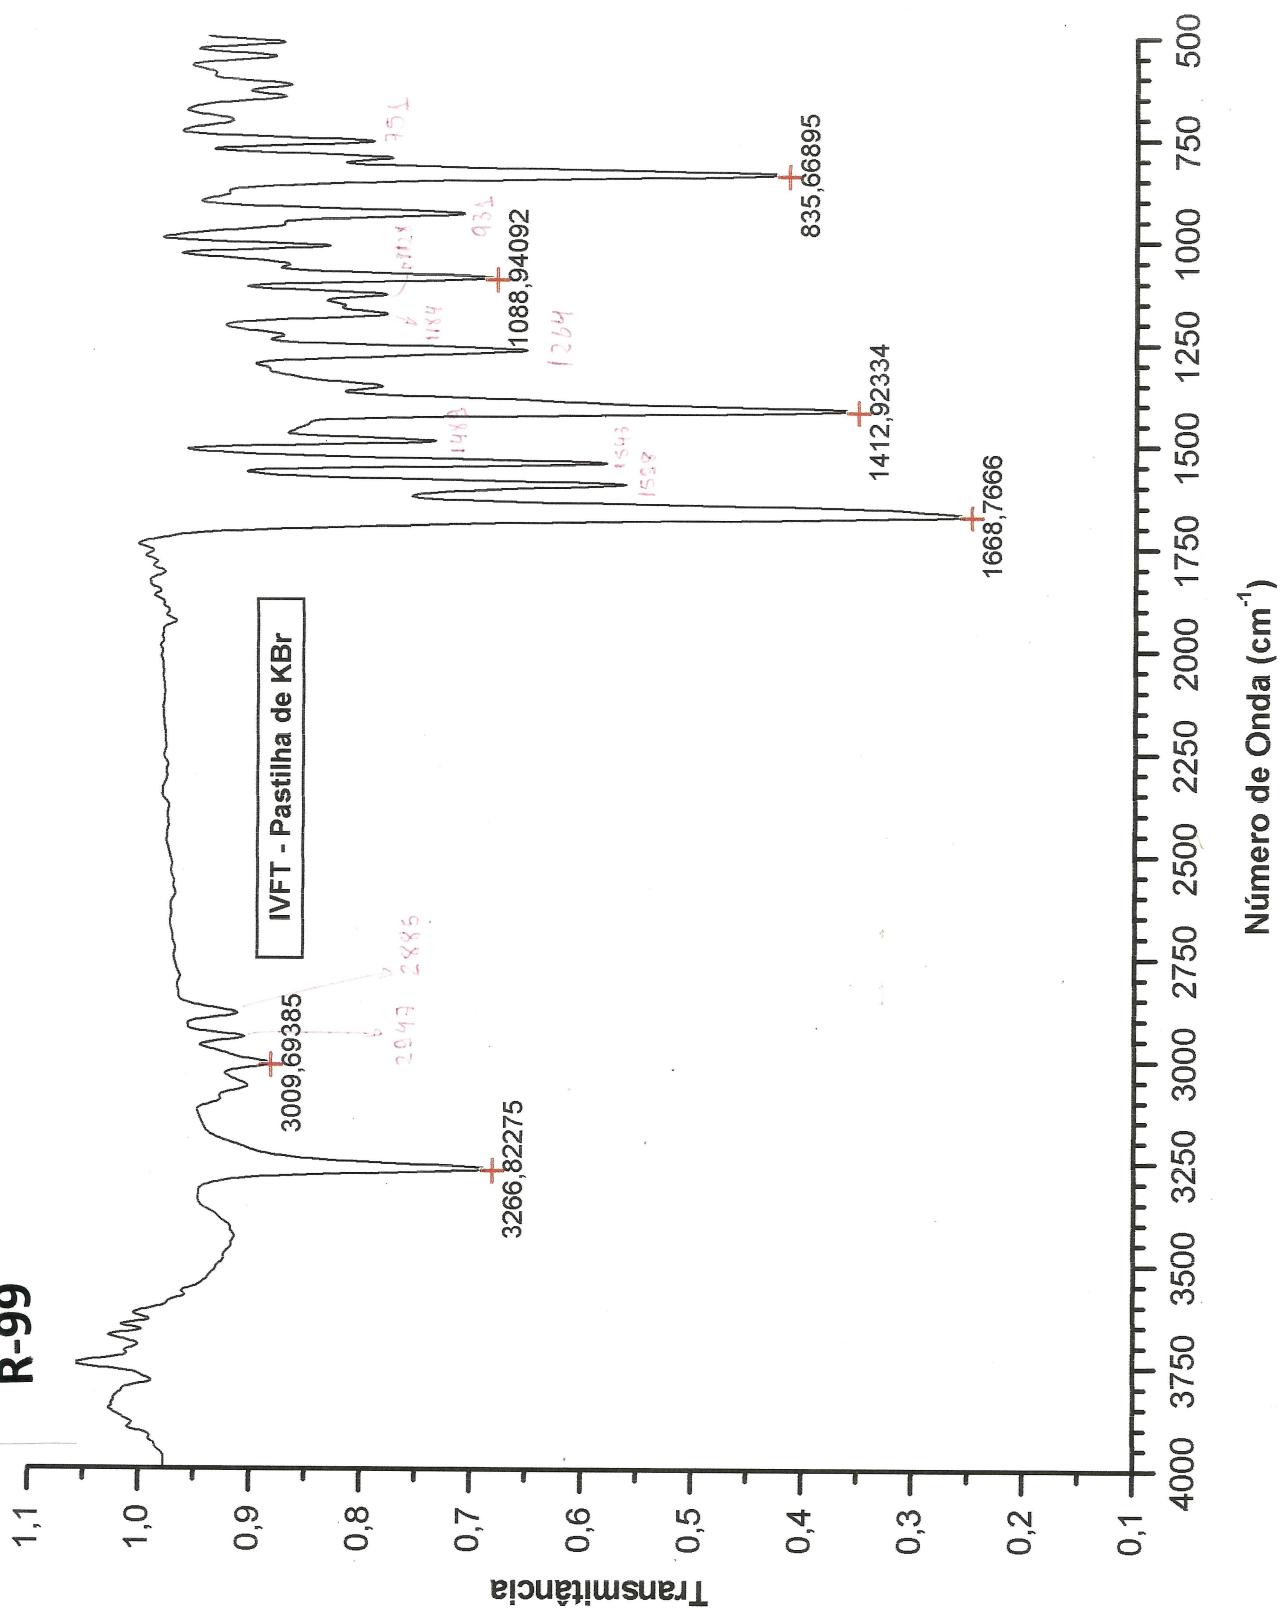



# CROMATOGRAMA DE IONS

MS Chromatogram  
R-99 C:\LabSolutions\Data\Central analitica\Data File\H1218-4.lcd

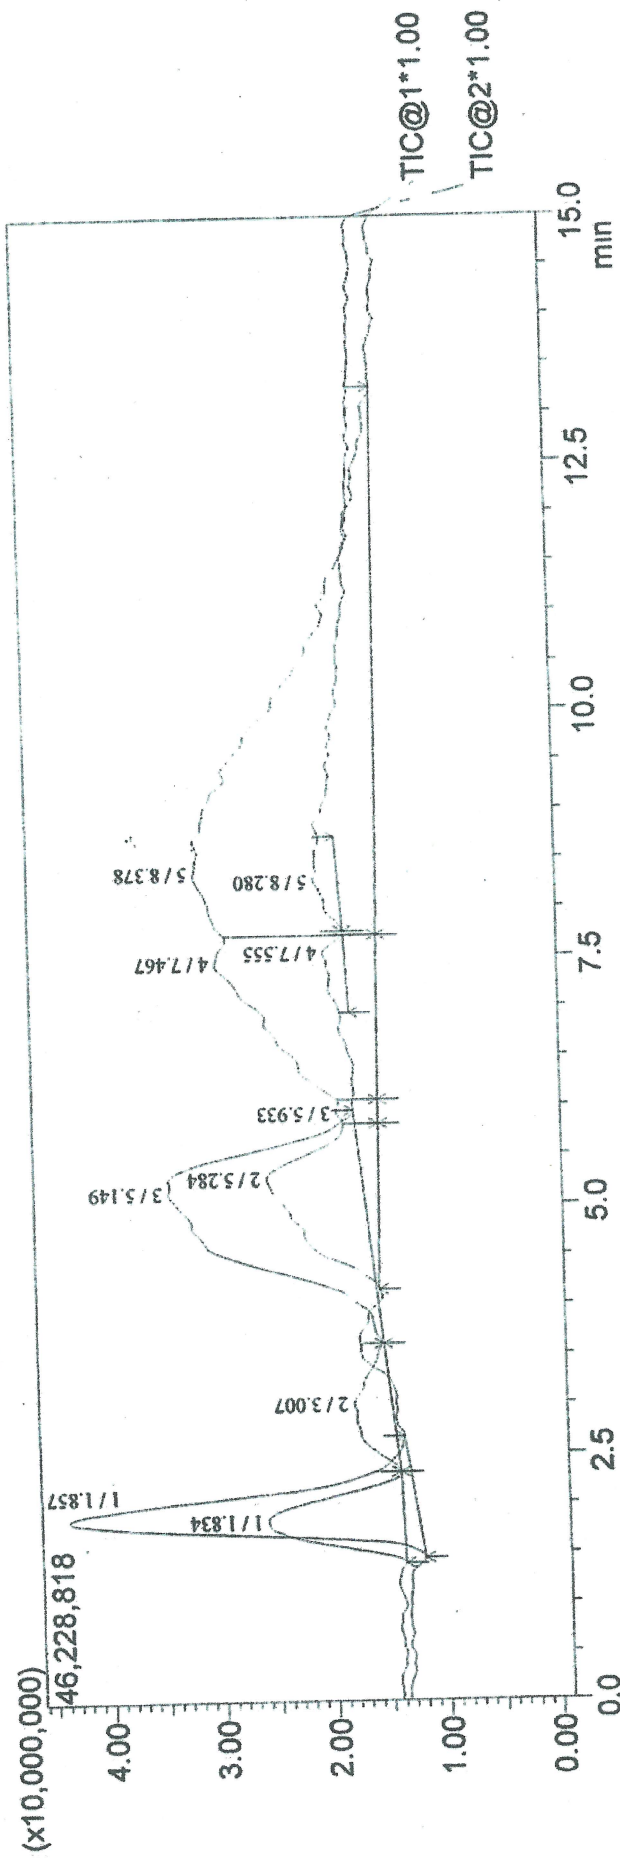

## ESPECTRO DE MASSAS R-99

MS Spectrum Graph

R-99

Peak#:2 Ret.Time:Averaged 5.267-5.293(Scan#:791-795)

BG Mode:Calc 4.160<->5.827(625<->875)

Mass Peaks:311 Base Peak:431.07(3493601) MS Stage:MS Polarity:Pos Segment1 - Event1 Precursor:----- Cutoff: Ionization Mo

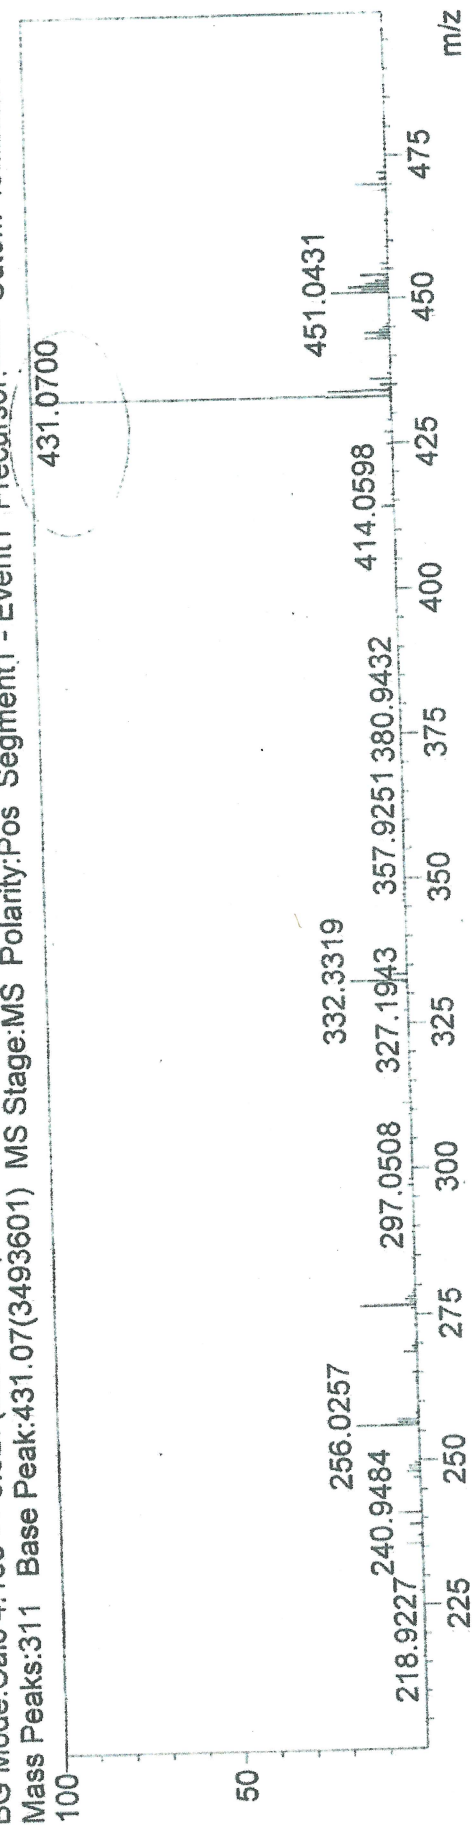

General  
-----  
DATE = 2019/07/05  
TIME = 14:18  
INSTRUM = spect  
PULPROG = zg30  
F1 (1H)  
SI = 65536  
SF = 600.09  
SWH = 12019.231

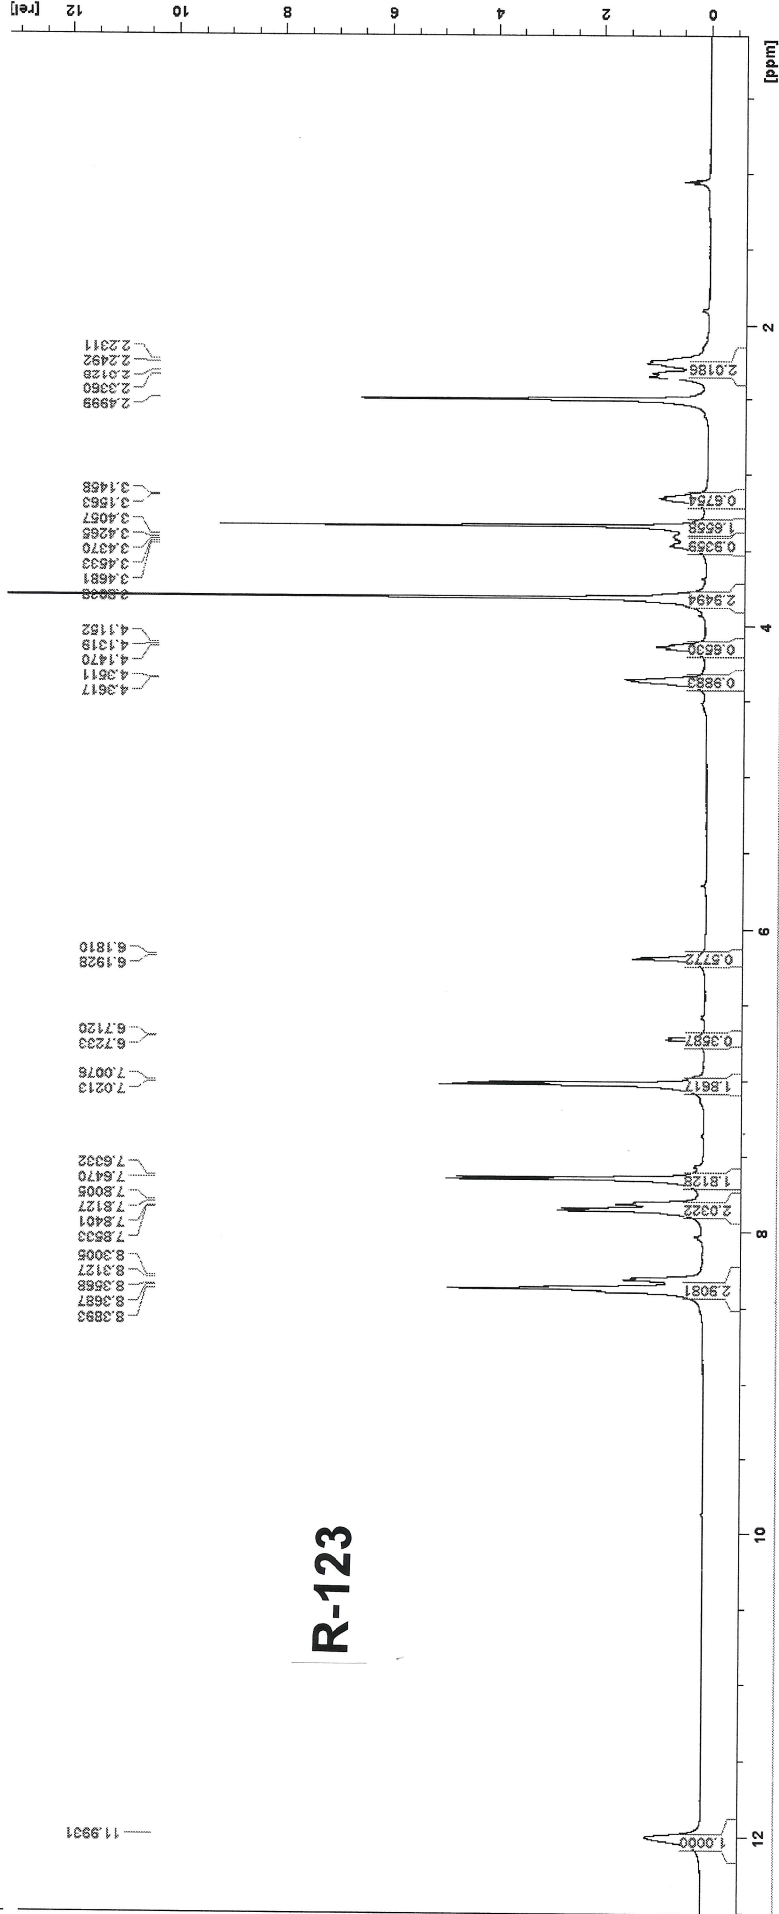

R-123





Valderez  
 Amostra R-123  
 Sollicitacao N. F0815\_13  
 30.08.07 UFPE  
 Pulse Sequence: s2pul  
 Solvent: DMSO  
 Ambient temperature  
 UNITYplus-300 "UFPEu300"

# R-123

Pulse 30.1 degrees  
 Acq. time 1.000 sec  
 Width 16501.7 Hz  
 40860 repetitions  
 OBSERVE C13, 75.4237251 MHZ  
 DECOUPLE H1, 299.9562907 MHZ  
 Power 33 dB  
 on during acquisition  
 off during delay  
 WALTZ-16 modulated  
 DATA PROCESSING  
 Line broadening 1.0 Hz  
 FT size 65536  
 Total time 11 hr, 30 min, 5 sec

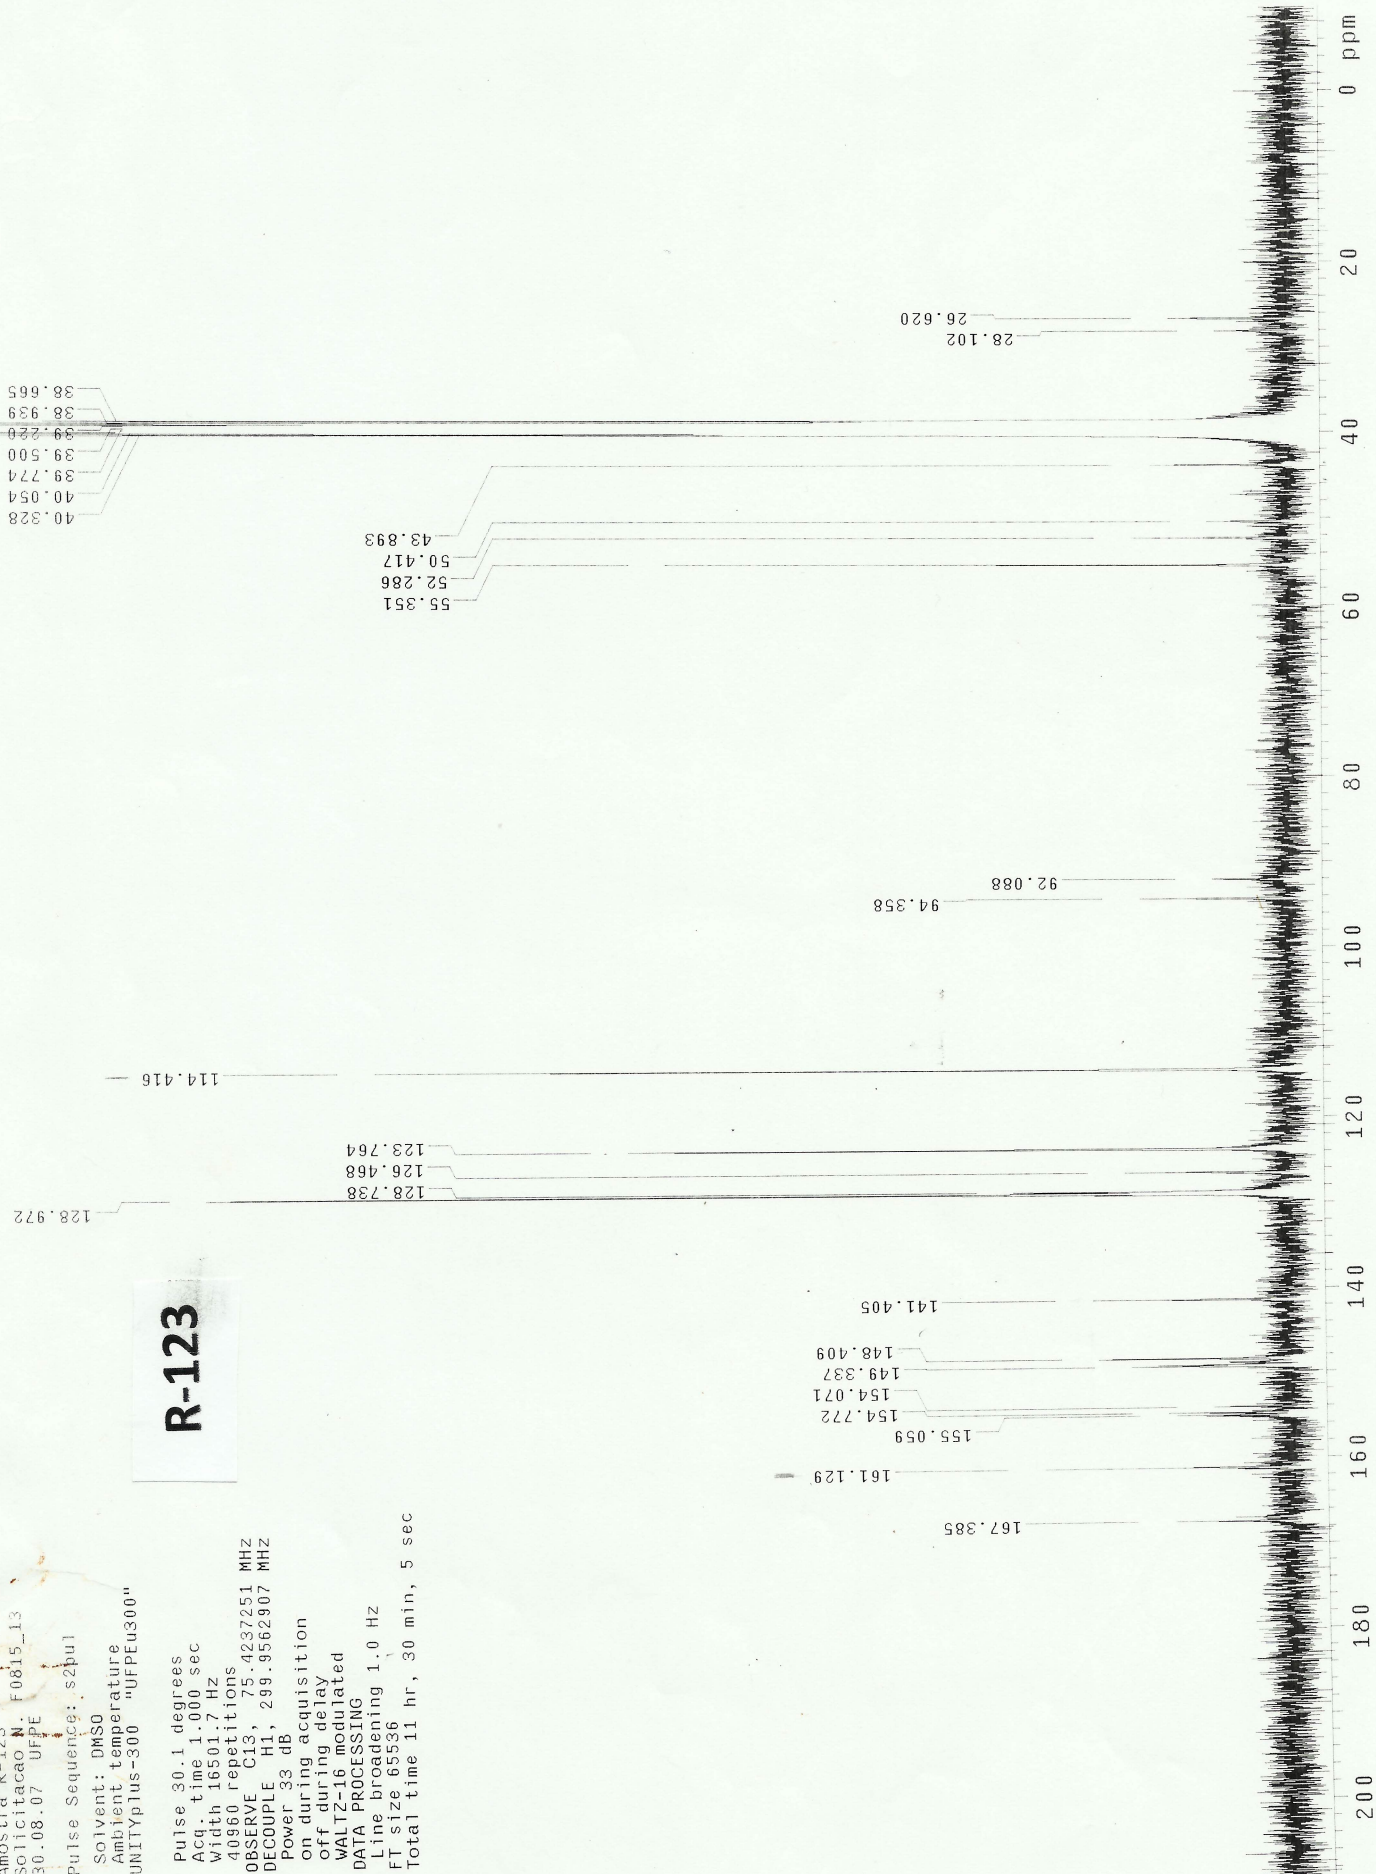

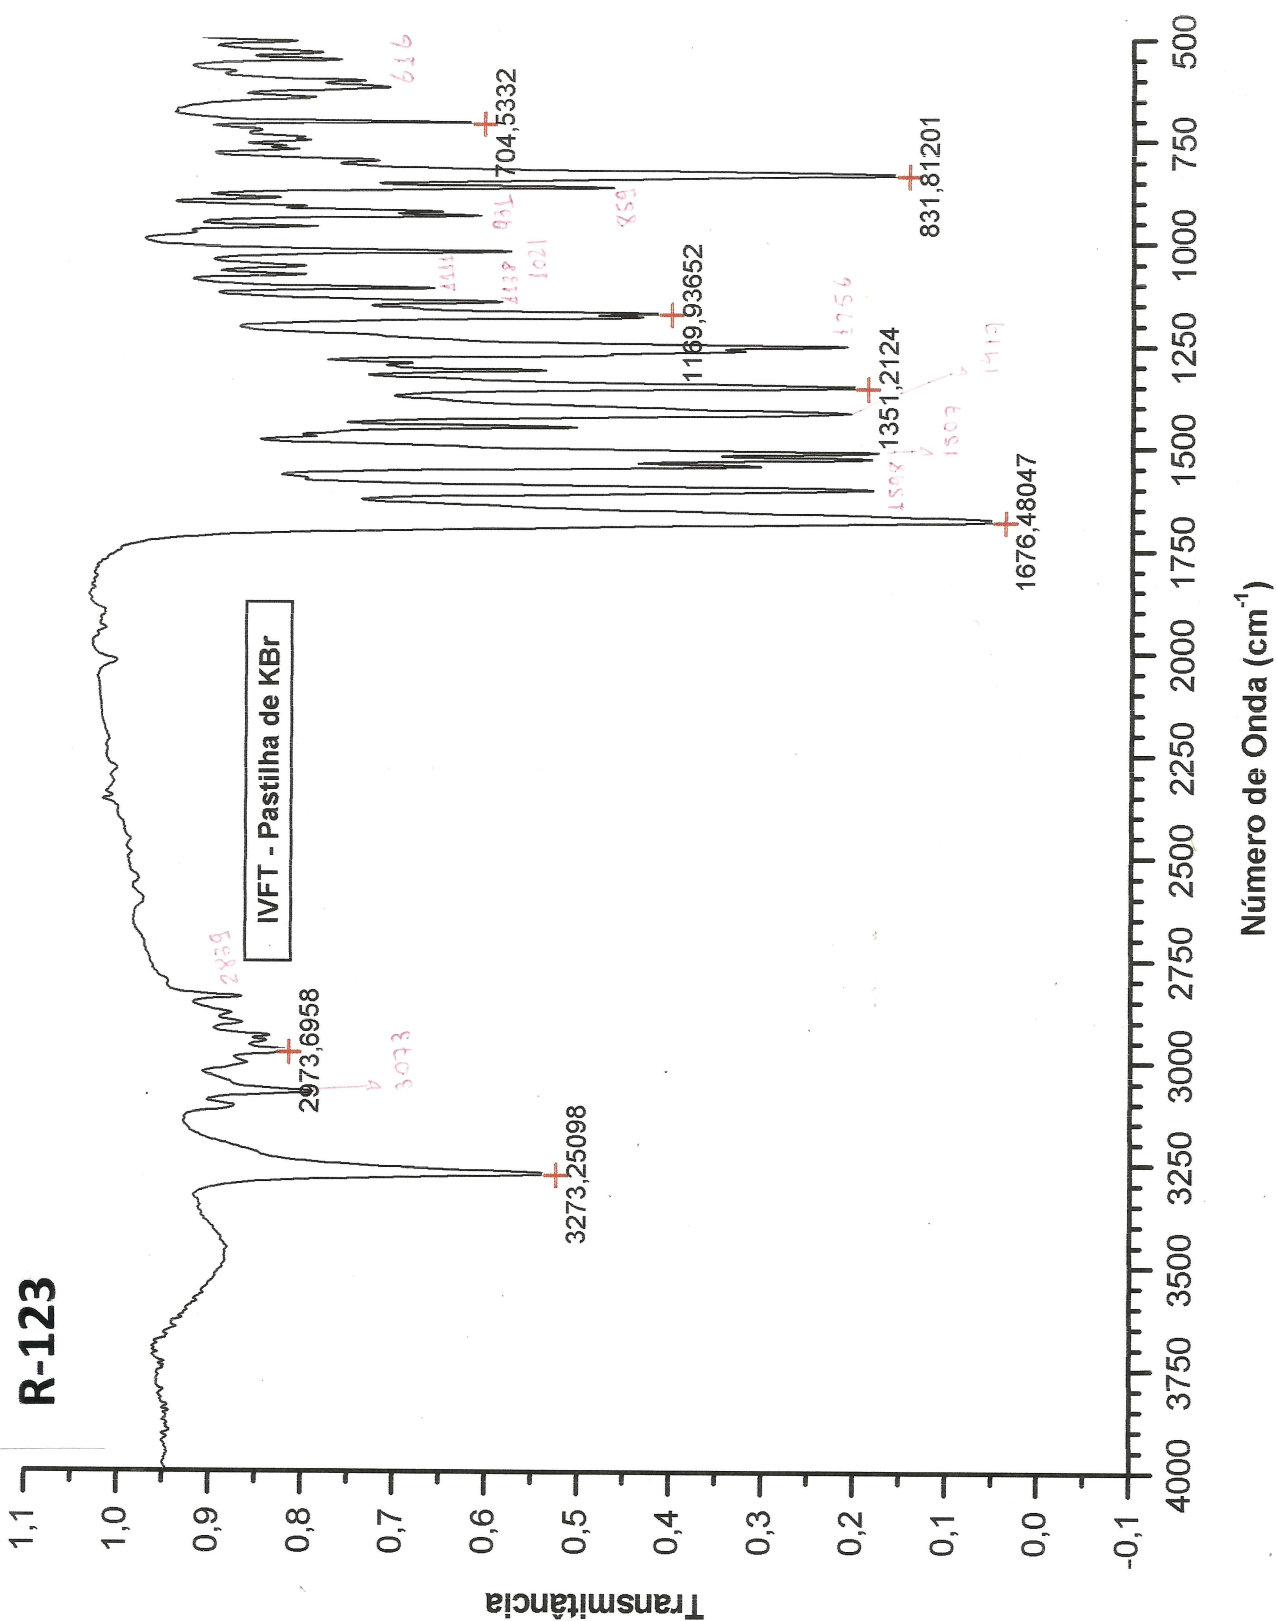

# CROMATOGRAMA DE IONES

MS Chromatogram  
R-123 C:\LabSolutions\Data\Central analitica\Data File\H1201-3.lcd

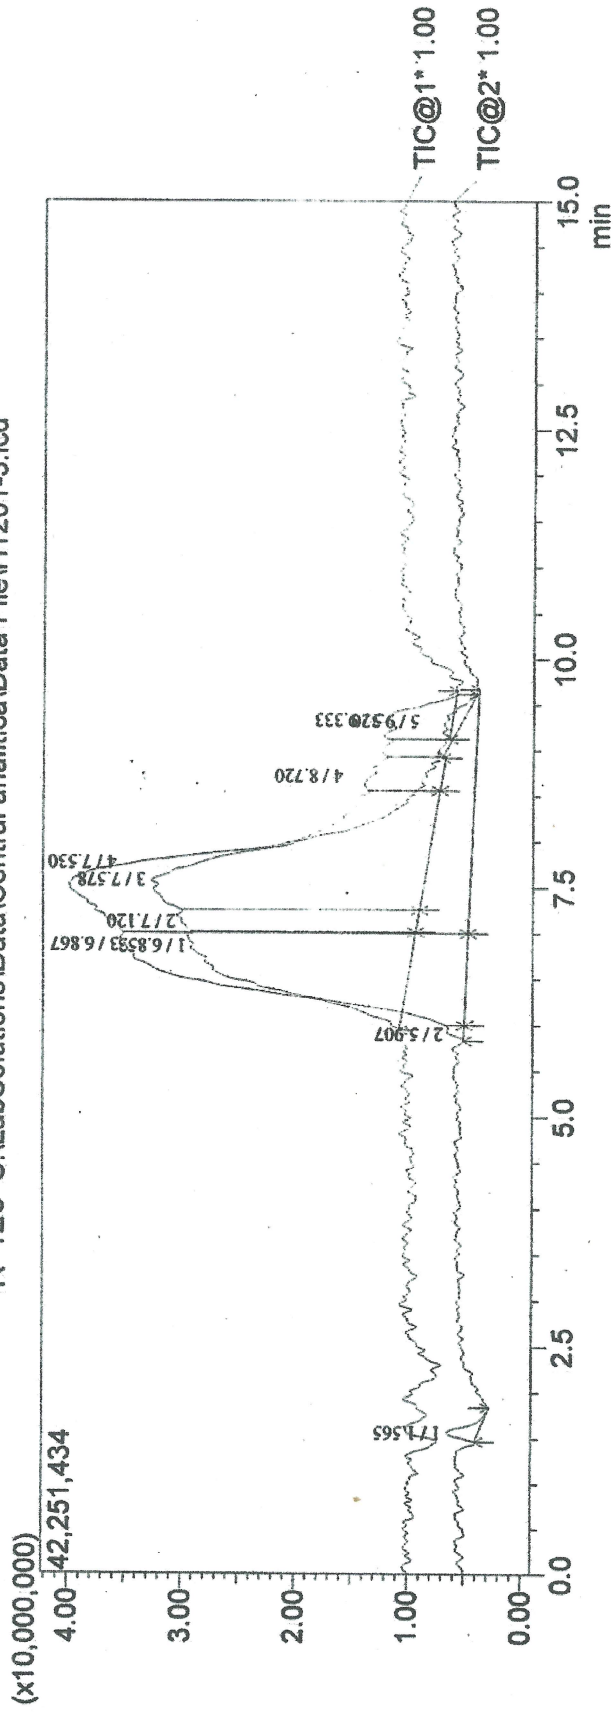

## ESPECTRO DE MASSAS R-123

R-123

MS Spectrum Graph

Peak#:1 Ret.Time:Averaged 6.840-6.867(Scan#:1027-1031)

BG Mode:Calc 5.947<->7.013(893<->1053)

Mass Peaks:266 Base Peak:438.15(7528841) MS Stage:MS Polarity:Pos Segment1 - Event1 Precursor:----- Cutoff: Ionization Mo

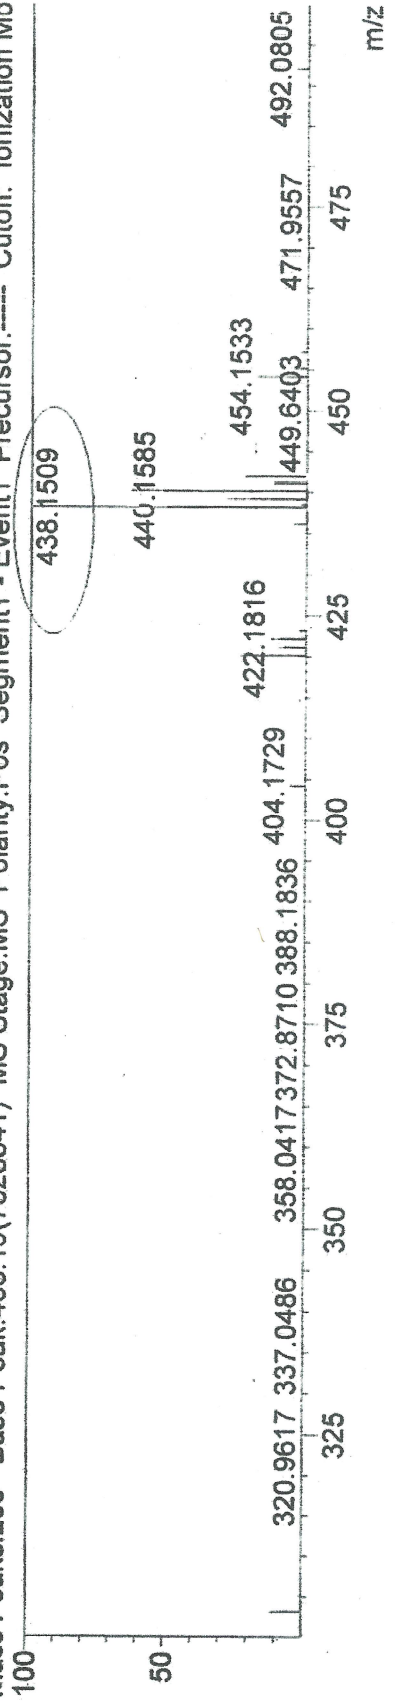

Supplement: c9md00276f1.pdf [file c9md00276f1.pdf]
